# Supplementary material for: The extent of error-prone replication restart by homologous recombination is controlled by Exo1 and checkpoint proteins
Source: PubMed Central journal article supplement (PMC4075360; doi:10.1242/jcs.152678), 2014-07-01
Supplement: supp_127.13.2983_JCS152678.pdf [file supp_127.13.2983_JCS152678.pdf]

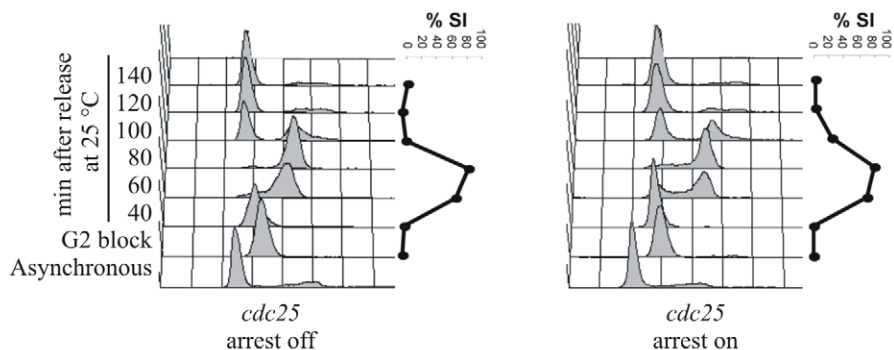

**Fig. S1. Activation of the *RTS1*-RFB does induce cell cycle delay.** Strain containing the *RuraR* locus and harboring the *cdc25-22* allele were grown at 25°C in minimal media with (arrest off) or without thiamine (arrest on) for 24 hours, then synchronized in G2 at 36°C for 4 hours and released at 25°C. Samples were taken at the indicated times and analyzed for septation index (an S-phase marker) and DNA content by FACS.

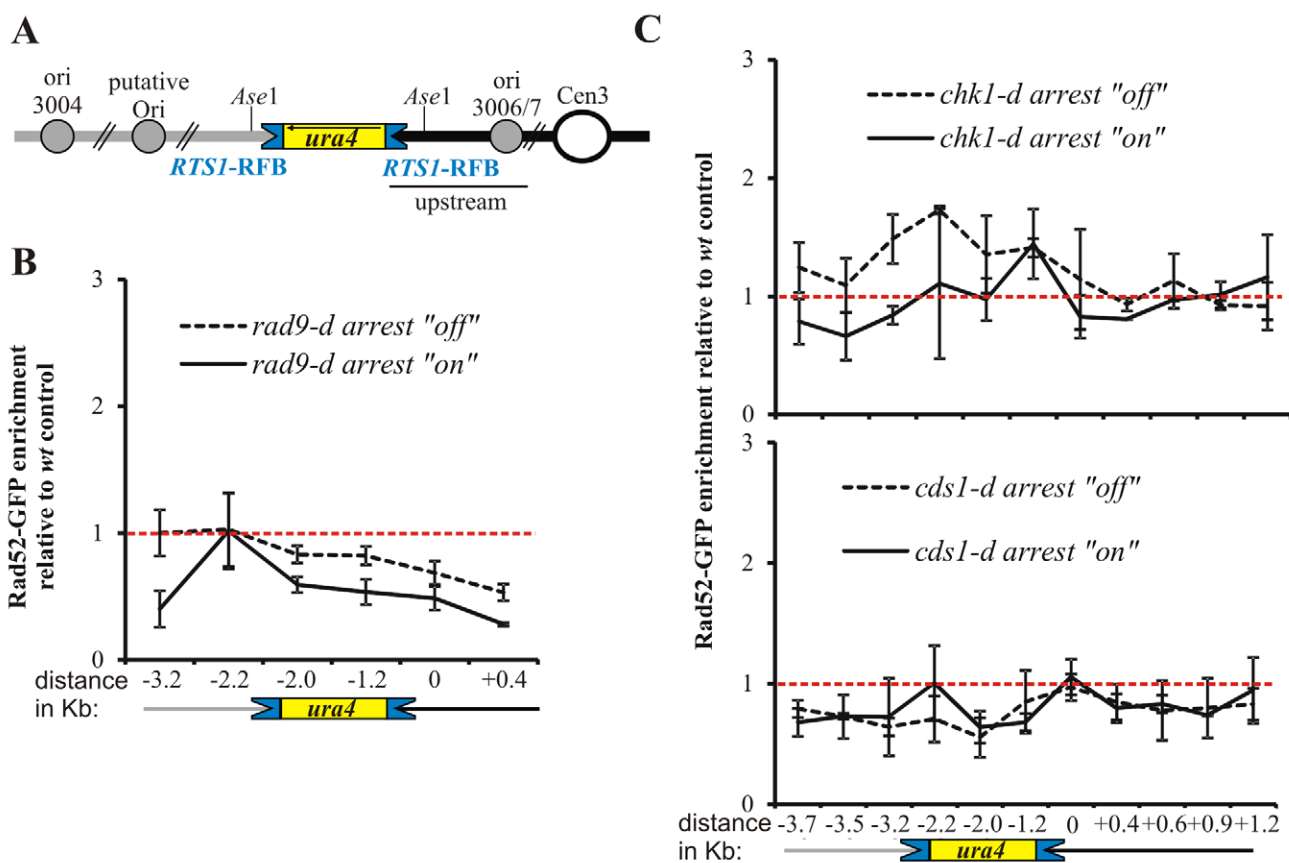

**Fig. S2. The checkpoint kinases Cds1 and Chk1 and the nuclease activity of Mre11 are not required to regulate Rad52 recruitment to the *RuraR* locus.** (A) Schematic representation of the *RuraR* locus. Grey and black lines indicate telomere and centromere proximal side of the *ura4* gene, respectively. Blue boxes represent the *RTSI*-RFBs and their polarity. *Ase1* sites are ~1 kb *cen* proximal and 0.6 Kb *tel* proximal from *RTS1* (see Fig. 1A for further details). (B). Rad52-GFP enrichment relative to wt at the *RuraR* locus in the *rad9-d* strains, as described for Fig. 1D. ChIP of Rad52-GFP followed by qPCR was carried out on the indicated *RuraR rad52<sup>+</sup>-GFP* strains after 40 hours growth either with or without thiamine (arrest "off" and "on" respectively). Cells containing the *RuraR* locus in a wild type (*wt*) background were analysed alongside an isogenic strain harboring the *rad9-d* alleles. Values are the mean from two to three independent experiments, with  $\pm$  95% CI. (C). An equivalent experiment for the *chk1 day* (top panel) and *cds1 day* (bottom panel) strain.

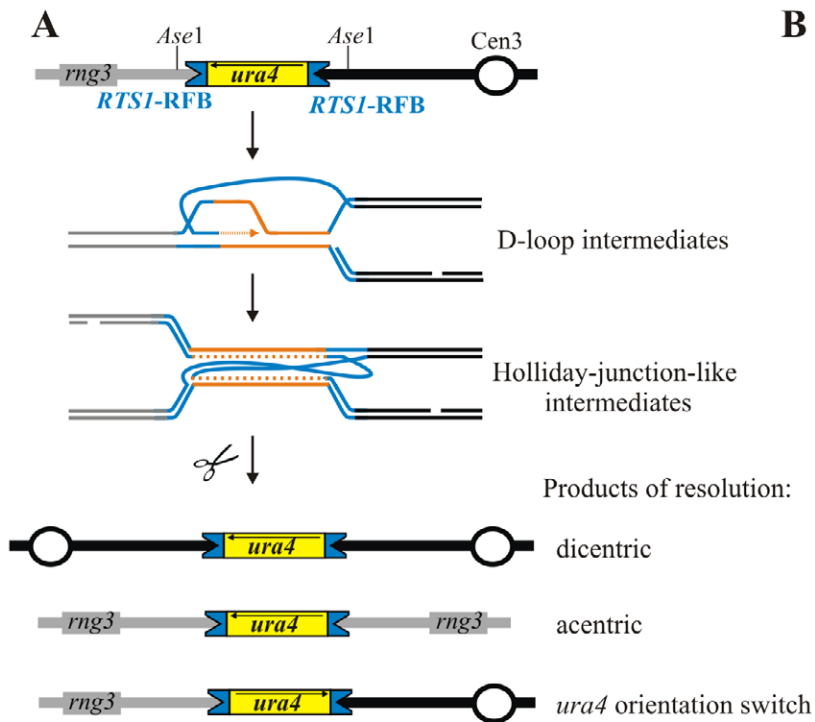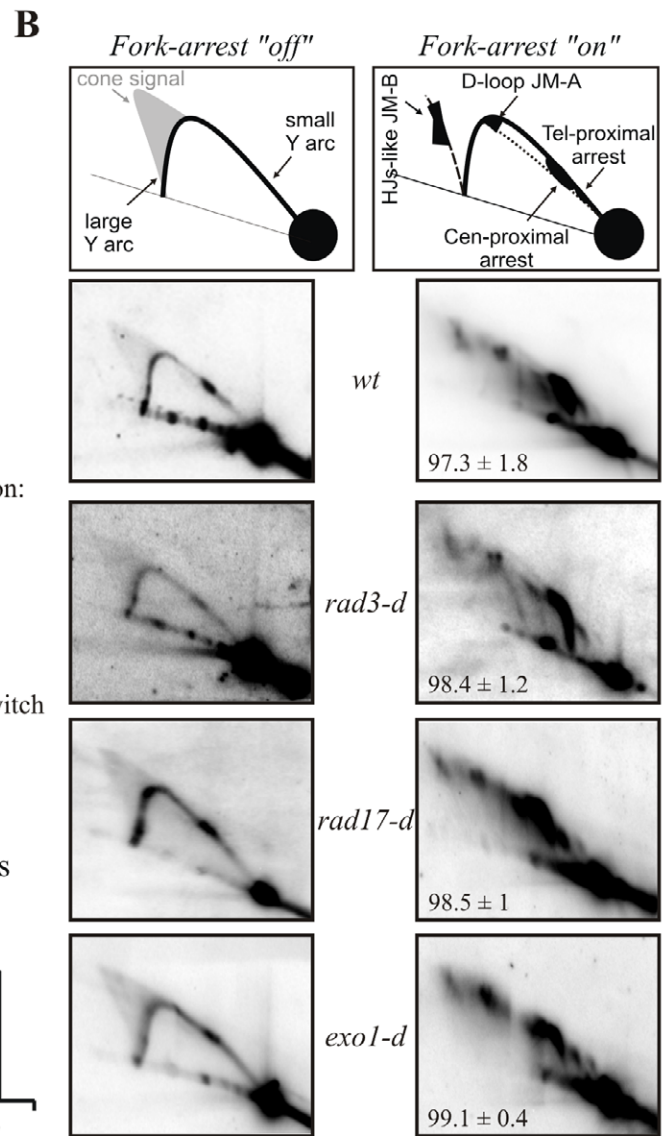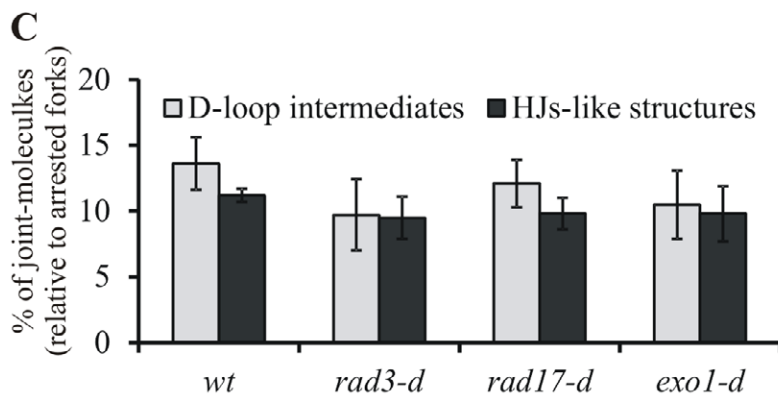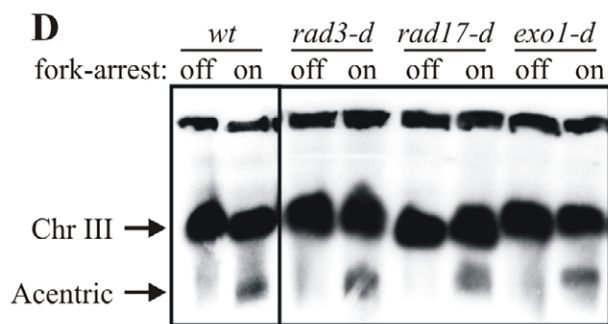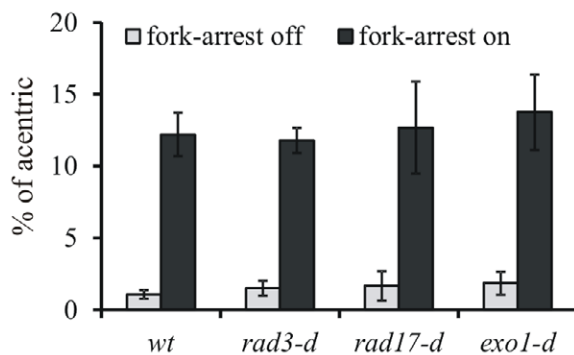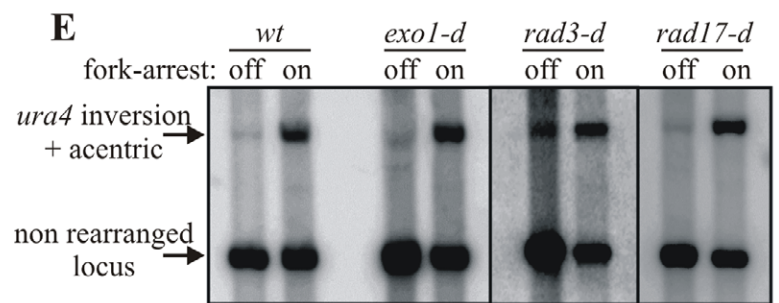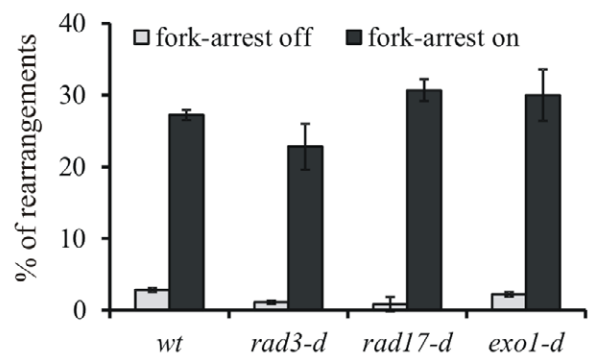

**Fig. S3. Checkpoint pathways do not affect template exchange occurring during the restarting of the fork at *RuraR*.** (A) Diagram of the *RuraR* locus (see Fig. 1 for details). Upon fork-arrest at the *RTS1*-RFB stalled nascent strands switch template and invade the opposite *RTS1* sequence, leading to the formation of an early joint-molecule (D-loop). The incoming of the opposite fork leads to a reciprocal template switch of stalled nascent strands leading to the formation of a late joint-molecule containing Holliday junctions (HJs). The resolution of HJ-like structures leads to three distinct products: acentric or dicentric isochromosomes and the inversion of *ura4* orientation. (B). Analysis of RIs by 2DGE from indicated strains grown in media containing or lacking thiamine (fork-arrest “off” and “on” respectively). Top panels are diagrams of RIs within the *Ase1* restriction fragment analysed by 2DGE in indicated conditions. Numbers indicate the percentage of forks arrested by the *RTS1*-RFB  $\pm$  standard deviation (SD). The panels from *wt* and *rad3-d* strains are also presented on Fig. 1C. (C). Quantification of joint-molecules observed in Panel B. Values are the mean of three independent experiments  $\pm$  s.d. (D). Top panel: chromosomes from indicated strains and conditions were separated by Pulse Field Gel Electrophoresis (PFGE) and analysed by Southern-blotting using an *rng3* probe, located *telomere*-proximal from *ura4*. Cells were grown for 48 hours in media with (fork arrest “off”) or without thiamine (fork-arrest “on”). Bottom panel: Quantification of the acentric level in indicated strains and conditions. Values correspond to the mean of three independent experiments  $\pm$  s.d. (E). Top panel: representative Southern blot showing accumulation of rearrangement following digestion of genomic DNA with *EcoRV*, Southern blotting and hybridisation with a *ura4* probe. Cells from indicated strains were grown for 48 hours with (fork-arrest “off”) or without (fork-arrest “on”) thiamine. Bottom panel: quantification of the amount of chromosomal rearrangements observed in the top panel. Values correspond to the mean of three independent experiments  $\pm$  s.d.

## Supplementary Table 1. qPCR primers used for ChIP

| Primer | Sequence (5'-3')            | Size | Primer | Sequence (5'-3')           | Size |
|--------|-----------------------------|------|--------|----------------------------|------|
| R1400F | CACCAAAGCCGATTTATCC         | 118  | L600R  | CCCTGGCGTTGTAGTTAGT        |      |
| R1400R | CCCGTATTTCTCAAATAAATCTCA    |      | L900F  | AACGGTTGTAGAAGACGAGCA      | 112  |
| R1200F | AGTATGTTAAGATGGCTTGTCTGTTC  | 80   | L900R  | TGTAAGCACACCTTCAATGTATCA   |      |
| R1200R | CCTAATGACAGCGGCAAGA         |      | L1200F | CAAATATGGAGTGCTTTATCTCCA   | 87   |
| R1000F | TTGCTTATCGATCACTGAATATTCT   | 94   | L1200R | CCTTTAATGAACGAAACTTAGAATCA |      |
| R1000R | AAGATGCATTTCCATTATAATCCTCTA |      | L1400F | AACATCGGTGACCTCGTTCT       | 83   |
| R800F  | TCTGATTTAAGGATACGTAGAACTGC  | 81   | L1400R | CTCTCGCTCCAAGCGTTAT        |      |
| R800R  | TGCTACTTATACAACCCGTGTATTG   |      | L1600F | CGACATAGATTCCGCTGATG       | 115  |
| R600F  | ACATGTGACATATAGTGATACACAACG | 87   | L1600R | TTCATCATTGTCGGTGTTC        |      |
| R600R  | GGGTACGAACTTACAGTGTACCAA    |      | L1800F | GGCAAAGTAGATCCGACAGC       | 101  |
| R400F  | CACACTTGCTCTGTACACGTATTCT   | 115  | L1800R | TGAATACGCCGTTACTCCTAAAG    |      |
| R400R  | AGGATCCATGATGCACAGATT       |      | L2000F | GGTGACGTCAAATCACCAAA       | 84   |
| R5F    | TTGCCAAACATCCTCCTACC        | 88   | L2000R | CCCACAAAGCTCTCATACAAA      |      |
| R5R    | GAAACACAAGCCAAAGTTGC        |      | L2200F | AAGGCAAGAAACGCTGAGAC       | 106  |
| R3F    | TTCTGTCCAACACCAATGTTT       | 97   | L2200R | GGCATGCATACTACCCGATAA      |      |
| R3R    | TGTACAAAGCCAATGAAAGATG      |      | L2400F | TTGCTTTCAAGAAAGTCACTGTAGTT | 82   |
| uraF   | TGATATGAGCCCAAGAAGCA        | 80   | L2400R | GTGCAGGAAGTGATGAATCG       |      |
| uraR   | CAAATTCGCAGACATTGGAA        |      | L2600F | ACAGATAAATGGCGCAAACC       | 109  |
| L5F    | AGGGCATTAAAGGCTTATTACAGA    | 118  | L2600R | CGAACACAAGTGTGGTCTTTG      |      |
| L5R    | TCACGTTTAATTTCAAACATCCA     |      | L2800F | GCATCAATTGCTCGTCAAAA       | 116  |
| L3F    | TTTAAATCAAATCTCCATGCG       | 91   | L2800R | GCGGTAAAATCGTGATATTTGAG    |      |
| L3R    | TGTACCCATGAGCAAACCTGC       |      | L3000F | TCGTACGTACTGCATCGCTATAA    | 115  |
| L400F  | ATCTGACATGGCATTCTCA         | 101  | L3000R | TTCATCCTACCTTCTAGTTCGGTAA  |      |
| L400R  | GATGCCAGACCGTAATGACA        |      | Ade623 | GGCTGCCTCTACCATCATT        | 109  |
| L600F  | CCATTGACTAGGAGGACTTTGAG     | 86   | Ade625 | TTAAGCTGAGCTGCCAAGGT       |      |

Size = amplicon size

## Supplementary Table 2. Strains used in the study.

| Strains      | Genotype                                                                                                                                                      | Reference    |
|--------------|---------------------------------------------------------------------------------------------------------------------------------------------------------------|--------------|
| ETS17        | <i>h<sup>-</sup> smt0 sup35:nmt41:rtf1<sup>+</sup> ade6-704 leu1-32 RuraR :ura4<sup>+</sup></i>                                                               | Lambert 2005 |
| ETS20        | <i>h<sup>-</sup> smt0 sup35:nmt41:rtf1<sup>+</sup> ade6-704 leu1-32 ura4<sup>+</sup></i>                                                                      | Lambert 2005 |
| ETS24/SL895  | <i>h<sup>-</sup> smt0 sup35:nmt41:rtf1<sup>+</sup> ade6-704 leu1-32 RuraR :ura4<sup>+</sup>rad3 ::HygMX</i>                                                   | This study   |
| ETS28/SL894  | <i>h<sup>-</sup> smt0 sup35:nmt41:rtf1<sup>+</sup> ade6-704 leu1-32 RuraR :ura4<sup>+</sup>rad9 ::NATMX</i>                                                   | This study   |
| ETS32 /SL896 | <i>h<sup>-</sup> smt0 sup35:nmt41:rtf1<sup>+</sup> ade6-704 leu1-32 RuraR :ura4<sup>+</sup>rad17 ::HygMX</i>                                                  | This study   |
| ETS207       | <i>h<sup>-</sup> smt0 sup35:nmt41:rtf1<sup>+</sup> ade6-704 leu1-32 RuraR :ura4<sup>+</sup>rad50::KanMX</i>                                                   | Lambert 2005 |
| ETS44        | <i>h<sup>-</sup> smt0 sup35:nmt41:rtf1<sup>+</sup> ade6-704 leu1-32 RuraR :ura4<sup>+</sup>chk1::KanMX</i>                                                    | This study   |
| ETS52        | <i>h<sup>-</sup> smt0 sup35:nmt41:rtf1<sup>+</sup> ade6-704 leu1-32 RuraR :ura4<sup>+</sup>cds1::NATMX</i>                                                    | This study   |
| ETS193/SL893 | <i>h<sup>-</sup> smt0 sup35:nmt41:rtf1<sup>+</sup> ade6-704 leu1-32 RuraR :ura4<sup>+</sup>exo1::NATMX</i>                                                    | This study   |
| SL350        | <i>h<sup>-</sup> sup35:nmt41:rtf1<sup>+</sup> ade6-704 leu1-32 uraR :ura4<sup>+</sup></i>                                                                     | Lambert 2005 |
| SL903/ETS412 | <i>h<sup>-</sup> smt0 sup35:nmt41:rtf1<sup>+</sup> ade6-704 leu1-32 uraR :ura4<sup>+</sup> rad17 ::HygMX</i>                                                  | This study   |
| SL907/ETS410 | <i>h<sup>-</sup> smt0 sup35:nmt41:rtf1<sup>+</sup> ade6-704 leu1-32 uraR :ura4<sup>+</sup> rad3 ::HygMX</i>                                                   | This study   |
| SL916/JZ52   | <i>h<sup>-</sup> smt0 sup35:nmt41:rtf1<sup>+</sup> ade6-704 leu1-32 uraR :ura4<sup>+</sup> exo1::NATMX</i>                                                    | This study   |
| II306/JZ54   | <i>h<sup>-</sup> smt0 sup35:nmt41:rtf1<sup>+</sup> ade6-704 leu1-32 uraR :ura4<sup>+</sup> exo1::NATMX rad3 ::HygMX</i>                                       | This study   |
| JZ107        | <i>h<sup>-</sup> smt0 sup35:nmt41:rtf1<sup>+</sup> ade6-704 leu1-32 uraR :ura4<sup>+</sup> exo1::NATMX rad17::HygMX</i>                                       | This study   |
| ETS57        | <i>h<sup>-</sup> smt0 sup35:nmt41:rtf1<sup>+</sup> ade6-704 leu1-32 RuraR :ura4<sup>+</sup> rad52<sup>-</sup>-GFP :KanMX</i>                                  | This study   |
| ETS62        | <i>h<sup>-</sup> smt0 sup35:nmt41:rtf1<sup>+</sup> ade6-704 leu1-32 RuraR :ura4<sup>+</sup> rad52<sup>-</sup>-GFP :KanMX rad3 ::HygMX</i>                     | This study   |
| ETS66        | <i>h<sup>-</sup> smt0 sup35:nmt41:rtf1<sup>+</sup> ade6-704 leu1-32 RuraR :ura4<sup>+</sup> rad52<sup>-</sup>-GFP :KanMX rad17 ::HygMX</i>                    | This study   |
| ETS70        | <i>h<sup>-</sup> smt0 sup35:nmt41:rtf1<sup>+</sup> ade6-704 leu1-32 RuraR :ura4<sup>+</sup> rad52<sup>-</sup>-GFP :KanMX chk1::KanMX</i>                      | This study   |
| ETS77        | <i>h<sup>-</sup> smt0 sup35:nmt41:rtf1<sup>+</sup> ade6-704 leu1-32 RuraR :ura4<sup>+</sup> rad52<sup>-</sup>-GFP :KanMX cds1::KanMX</i>                      | This study   |
| ETS136       | <i>h<sup>-</sup> smt0 sup35:nmt41:rtf1<sup>+</sup> ade6-704 leu1-32 RuraR :ura4<sup>+</sup> rad52<sup>-</sup>-GFP :KanMX rad9 ::NATMX</i>                     | This study   |
| ETS185       | <i>h<sup>-</sup> smt0 sup35:nmt41:rtf1<sup>+</sup> ade6-704 leu1-32 RuraR :ura4<sup>+</sup> rad52<sup>-</sup>-GFP :KanMX rad3 ::HygMX rad17 ::NATMX</i>       | This study   |
| ETS233       | <i>h<sup>-</sup> smt0 sup35:nmt41:rtf1<sup>+</sup> ade6-704 leu1-32 RuraR :ura4<sup>+</sup> rad52<sup>-</sup>-GFP :KanMX exo1 ::NATMX</i>                     | This study   |
| ETS235       | <i>h<sup>-</sup> smt0 sup35:nmt41:rtf1<sup>+</sup> ade6-704 leu1-32 RuraR :ura4<sup>+</sup> rad52<sup>-</sup>-GFP :KanMX exo1 ::NATMX rad3 ::HygMX</i>        | This study   |
| ETS241       | <i>h<sup>-</sup> smt0 sup35:nmt41:rtf1<sup>+</sup> ade6-704 leu1-32 RuraR :ura4<sup>+</sup> rad52<sup>-</sup>-GFP :HygMX rad50 ::KanMX</i>                    | This study   |
| ETS254       | <i>h<sup>-</sup> smt0 sup35:nmt41:rtf1<sup>+</sup> ade6-704 leu1-32 RuraR :ura4<sup>+</sup> rad52<sup>-</sup>-GFP :HygMX rad3::NATMX</i>                      | This study   |
| ETS320       | <i>h<sup>-</sup> smt0 sup35:nmt41:rtf1<sup>+</sup> ade6-704 leu1-32 RuraR :ura4<sup>+</sup> rad52<sup>-</sup>-GFP :HygMX rad3 ::NatMX rad50::KanMX</i>        | This study   |
| ETS375       | <i>h<sup>-</sup> smt0 sup35:nmt41:rtf1<sup>+</sup> ade6-704 leu1-32 RuraR :ura4<sup>+</sup> rad52<sup>-</sup>-GFP :KanMX rad32-D65N</i>                       | This study   |
| ETS383       | <i>h<sup>-</sup> smt0 sup35:nmt41:rtf1<sup>+</sup> ade6-704 leu1-32 RuraR :ura4<sup>+</sup> rad52<sup>-</sup>-GFP :KanMX rad3::HygMX rad32-D65N</i>           | This study   |
| YC5          | <i>h<sup>-</sup> sup35:nmt41:rtf1<sup>+</sup> ade6-704 leu1-32 ura4-sd20</i>                                                                                  | Iraqi 2012   |
| YC13         | <i>h<sup>-</sup> sup35:nmt41:rtf1<sup>+</sup> ade6-704 leu1-32 ura4-sd20 :RTS1</i>                                                                            | Iraqi 2012   |
| YC21         | <i>h<sup>-</sup> sup35:nmt41:rtf1<sup>+</sup> ade6-704 leu1-32 RTS1 :ura4-sd20</i>                                                                            | Iraqi 2012   |
| II264        | <i>h<sup>-</sup> sup35:nmt41:rtf1<sup>+</sup> ade6-704 leu1-32 ura4-sd20 exo1 :NATMX</i>                                                                      | This study   |
| II258        | <i>h<sup>-</sup> sup35:nmt41:rtf1<sup>+</sup> ade6-704 leu1-32 ura4-sd20 :RTS1 exo1 :NATMX</i>                                                                | This study   |
| II324        | <i>h<sup>-</sup> sup35:nmt41:rtf1<sup>+</sup> ade6-704 leu1-32 RTS1 :ura4-sd20 exo1 :NATMX</i>                                                                | This study   |
| II340        | <i>h<sup>-</sup> sup35:nmt41:rtf1<sup>+</sup> ade6-704 leu1-32 ura4-sd20 rad3 ::HygMX</i>                                                                     | This study   |
| II317        | <i>h<sup>-</sup> sup35:nmt41:rtf1<sup>+</sup> ade6-704 leu1-32 ura4-sd20 :RTS1 rad3 ::HygMX</i>                                                               | This study   |
| II334        | <i>h<sup>-</sup> sup35:nmt41:rtf1<sup>+</sup> ade6-704 leu1-32 RTS1 :ura4-sd20 rad3 ::HygMX</i>                                                               | This study   |
| II359        | <i>h<sup>-</sup> sup35:nmt41:rtf1<sup>+</sup> ade6-704 leu1-32 ura4-sd20 rad3 ::HygMX exo1 :NATMX</i>                                                         | This study   |
| II352        | <i>h<sup>-</sup> sup35:nmt41:rtf1<sup>+</sup> ade6-704 leu1-32 ura4-sd20 :RTS1 rad3 ::HygMX exo1 :NATMX</i>                                                   | This study   |
| II346        | <i>h<sup>-</sup> sup35:nmt41:rtf1<sup>+</sup> ade6-704 leu1-32 RTS1 :ura4-sd20 rad3 ::HygMX exo1 :NATMX</i>                                                   | This study   |
| ETS349       | <i>h<sup>-</sup> smt-0 ura4-D18 leu1-32 his3-D1 arg3-D4 ade6-M375 int::pUC8/his3+/RTS1(A2)/ade6-L469 tRNA:nmt41:rtf1<sup>+</sup></i>                          | This study   |
| IM836        | <i>h<sup>-</sup> smt-0 ura4-D18 leu1-32 his3-D1 arg3-D4 ade6-M375 int::pUC8/his3+/RTS1(A2)/ade6-L469 tRNA:nmt41:rtf1<sup>+</sup> rad3::HygMX</i>              | This study   |
| IM838        | <i>h<sup>-</sup> smt-0 ura4-D18 leu1-32 his3-D1 arg3-D4 ade6-M375 int::pUC8/his3+/RTS1(A2)/ade6-L469 tRNA:nmt41:rtf1<sup>+</sup> rad17::HygMX</i>             | This study   |
| IM840        | <i>h<sup>-</sup> smt-0 ura4-D18 leu1-32 his3-D1 arg3-D4 ade6-M375 int::pUC8/his3+/RTS1(A2)/ade6-L469 tRNA:nmt41:rtf1<sup>+</sup> exo1::NATMX</i>              | This study   |
| IM842        | <i>h<sup>-</sup> smt-0 ura4-D18 leu1-32 his3-D1 arg3-D4 ade6-M375 int::pUC8/his3+/RTS1(A2)/ade6-L469 tRNA:nmt41:rtf1<sup>+</sup> rad3::HygMX exo1::NATMX</i>  | This study   |
| IM844        | <i>h<sup>-</sup> smt-0 ura4-D18 leu1-32 his3-D1 arg3-D4 ade6-M375 int::pUC8/his3+/RTS1(A2)/ade6-L469 tRNA:nmt41:rtf1<sup>+</sup> rad17::HygMX exo1::NATMX</i> | This study   |
